# Supplementary material for: Comparative study of luminescent Cd-MOF and Cd-MOF@HNT nanomaterials for the detection of hydroxyl-functionalized nitroaromatic compounds
Source: Royal Society of Chemistry journal article supplement (doi:10.1039/d4nj04352a), 2024-01-01
Supplement: d4nj04352a1.pdf [file d4nj04352a1.pdf]

## Comparative Study of Luminescent Cd-MOF and Cd-MOF@HNT Nanomaterial for detection of Hydroxyl-Functionalized Nitroaromatic compounds

Kushal Arya,<sup>a</sup> Sanjay Mehra,<sup>b</sup> Ajay Kumar,<sup>a,c</sup> Vaneet Saini,<sup>a</sup> Arvind Kumar,<sup>b</sup> Surinder Kumar Mehta,<sup>a</sup> Ramesh Kataria<sup>a\*</sup>

<sup>a</sup>Department of Chemistry, Centre for Advanced studies in Chemistry, Panjab University, Chandigarh, India-160014.

<sup>b</sup>CSIR-Central Salt and Marine Chemicals Research Institute, Council of Scientific and Industrial Research, Bhavnagar, Gujarat, India-364002.

<sup>c</sup>University Center for Research and Development, Chandigarh University, Mohali, Punjab-140301, India

Email: [rkataria@pu.ac.in](mailto:rkataria@pu.ac.in)

| Sr. No.  | CONTENTS                                                                                                                      |
|----------|-------------------------------------------------------------------------------------------------------------------------------|
| Fig. S1  | FTIR analysis of PUC-10 and both the ligands L1 and ATA (2-aminoterephthalic acid) which are used to synthesize PUC-10.       |
| Fig. S2  | FTIR spectra of PUC-10 and PUC-10@HNT.                                                                                        |
| Fig. S3  | TGA analysis of PUC-10.                                                                                                       |
| Fig. S4  | N <sub>2</sub> sorption isotherm for PUC-10 (a) and pore size distribution curve for PUC-10 based on adsorption isotherm (b). |
| Fig. S5  | Size distribution histogram plot of PUC-10@HNT.                                                                               |
| Fig. S6  | Elemental mapping (a) and EDX spectrum (b) of PUC-10.                                                                         |
| Fig. S7  | Mapping of elemental distribution of Cd (a), C (b), N (c) and O (d) of PUC-10.                                                |
| Fig. S8  | Elemental mapping (a) and EDX spectrum (b) of PUC-10 NPs.                                                                     |
| Fig. S9  | Mapping of elemental distribution of Cd (a), C (b), N (c) and O (d) of PUC-10                                                 |
| Fig. S10 | Elemental mapping (a) and EDX spectrum (b) of PUC-10@HNT.                                                                     |
| Fig. S11 | Mapping of elemental distribution of Cd (a), C (b), N (c), O (d), Al (e) and Si (f) of PUC-10@HNT.                            |

|          |                                                                                                                                                                                                          |
|----------|----------------------------------------------------------------------------------------------------------------------------------------------------------------------------------------------------------|
| Fig S12  | High-resolution XPS spectrum of Cd 3d <b>(a)</b> , C 1s <b>(b)</b> , N 1s <b>(c)</b> and O 1s <b>(d)</b> elements present in PUC-10.                                                                     |
| Fig S13  | High-resolution XPS spectrum of Cd 3d <b>(a)</b> , C 1s <b>(b)</b> , N 1s <b>(c)</b> and O 1s <b>(d)</b> elements present in PUC-10 after treatment with TNP.                                            |
| Fig. S14 | High-resolution XPS spectrum of Cd 3d <b>(a)</b> , N 1s <b>(b)</b> , O 1s <b>(c)</b> and C 1s <b>(d)</b> elements present in PUC-10 after treatment with DNP.                                            |
| Fig. S15 | High-resolution XPS spectrum of Cd 3d <b>(a)</b> , C 1s <b>(b)</b> , N 1s <b>(c)</b> and O 1s <b>(d)</b> elements present in PUC-10 after treatment with 4-NP.                                           |
| Fig. S16 | High-resolution XPS spectrum of Cd 3d <b>(a)</b> , N 1s <b>(b)</b> , Si 2p <b>(c)</b> , O 1s <b>(d)</b> , C 1s <b>(e)</b> and Al 2p <b>(f)</b> elements present in PUC-10@HNT after treatment with TNP.  |
| Fig. S17 | High-resolution XPS spectrum of Cd 3d <b>(a)</b> , C 1s <b>(b)</b> , O 1s <b>(c)</b> , N 1s <b>(d)</b> , Si 2p <b>(e)</b> and Al 2p <b>(f)</b> elements present in PUC-10@HNT after treatment with DNP.  |
| Fig. S18 | High-resolution XPS spectrum of Cd 3d <b>(a)</b> , C 1s <b>(b)</b> , N 1s <b>(c)</b> , O 1s <b>(d)</b> , Si 2p <b>(e)</b> and Al 2p <b>(f)</b> elements present in PUC-10@HNT after treatment with 4-NP. |
| Fig. S19 | Emission spectra of PUC-10@HNT at different excitation wavelengths ranging from 300 to 350 nm.                                                                                                           |
| Fig. S20 | Emission spectra of PUC-10@HNT and both the ligands L <sub>1</sub> and H <sub>2</sub> TP used in the synthesis of PUC-10.                                                                                |
| Fig. S21 | Excitation and emission spectra of PUC-10@HNT.                                                                                                                                                           |
| Fig. S22 | Emission spectra <b>(a)</b> and normalized fluorescence intensity <b>(b)</b> of PUC-10@HNT at different pH values ranging from 2 to 12.                                                                  |
| Fig. S23 | Emission spectra <b>(a)</b> and normalized fluorescence intensity <b>(b)</b> of PUC-10@HNT in different solvents.                                                                                        |
| Fig. S24 | Stern-Volmer plot of PUC-10@HNT in the presence of 0-20 $\mu$ M concentration of TNP.                                                                                                                    |
| Fig. S25 | Stern-Volmer plot of PUC-10@HNT in the presence of 0-20 $\mu$ M concentration of                                                                                                                         |

|          |                                                                                                                                                                            |
|----------|----------------------------------------------------------------------------------------------------------------------------------------------------------------------------|
|          | DNP.                                                                                                                                                                       |
| Fig. S26 | Stern-Volmer plot of PUC-10@HNT in the presence of 0-20 $\mu\text{M}$ concentration of 4-NP.                                                                               |
| Fig. S27 | Calibration curve of PUC-10@HNT on the addition of TNP (0-20 $\mu\text{M}$ ).                                                                                              |
| Fig. S28 | Calibration curve of PUC-10@HNT on the addition of DNP (0-20 $\mu\text{M}$ ).                                                                                              |
| Fig. S29 | Calibration curve of PUC-10@HNT on the addition of 4-NP (0-20 $\mu\text{M}$ ).                                                                                             |
| Fig. S30 | The emission spectrum of PUC-10 before and after incremental addition of TNP from 0 to 66.6 $\mu\text{M}$ concentration <b>(a)</b> and its Calibration curve <b>(b)</b> .  |
| Fig. S31 | The emission spectrum of PUC-10 before and after incremental addition of DNP from 0 to 66.6 $\mu\text{M}$ concentration <b>(a)</b> and its Calibration curve <b>(b)</b> .  |
| Fig. S32 | The emission spectrum of PUC-10 before and after incremental addition of 4-NP from 0 to 66.6 $\mu\text{M}$ concentration <b>(a)</b> and its Calibration curve <b>(b)</b> . |
| Fig. S33 | The stern-Volmer plot of PUC-10 in the presence of 0-66.6 $\mu\text{M}$ concentration of 4-NP.                                                                             |
| Fig. S34 | The stern-Volmer plot of PUC-10 in the presence of 0-66.6 $\mu\text{M}$ concentration of 4-NP.                                                                             |
| Fig. S35 | The stern-Volmer plot of PUC-10 in the presence of 0-66.6 $\mu\text{M}$ concentration of 4-NP.                                                                             |
| Fig. S36 | Calibration curve of PUC-10@HNT on the addition of TNP (0-20 $\mu\text{M}$ ) using real water sample (tap water) as solvent.                                               |
| Fig. S37 | Calibration curve of PUC-10@HNT on the addition of DNP (0-20 $\mu\text{M}$ ) using real water sample (tap water) as solvent.                                               |
| Fig. S38 | Calibration curve of PUC-10@HNT on the addition of 4-NP (0-20 $\mu\text{M}$ ) using real water sample (tap water) as solvent.                                              |
| Fig. S39 | Zeta potential analysis curve of PUC-10@HNT before <b>(a)</b> and after the addition of TNP <b>(b)</b> , DNP <b>(c)</b> and 4-NP <b>(d)</b> .                              |
| Fig. S40 | Recyclability of PUC-10@HNT with TNP (pink), DNP (orange) and 4-NP                                                                                                         |

|          | (green).                                                                  |
|----------|---------------------------------------------------------------------------|
| Tables   |                                                                           |
| Table S1 | Crystal Data and Structure Refinement for <b>PUC-10</b> .                 |
| Table S2 | Crystallographic features for PUC-10 and PUC-10@HNT.                      |
| Table S3 | Compositional ratios of all the elements present in PUC-10 and PUC-10@HNT |

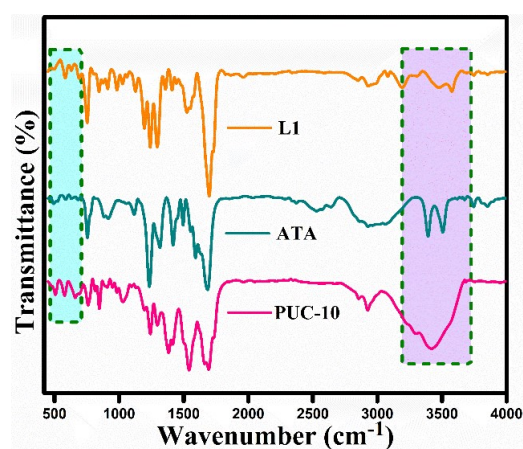

**Figure S1.** FTIR analysis of PUC-10 and both the ligands L1 and ATA (2-aminoterephthalic acid) which are used to synthesize PUC-10.

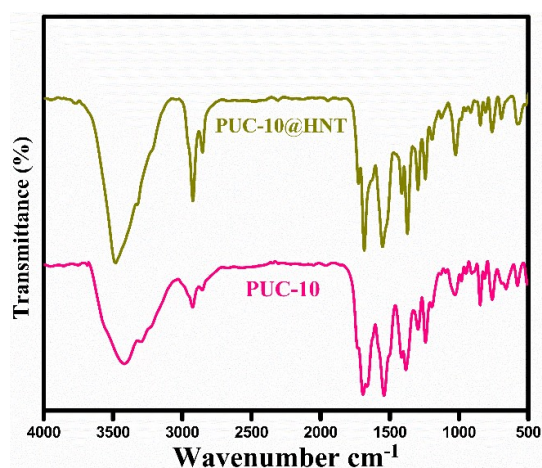

**Figure S2.** FTIR spectra of PUC-10 and PUC-10@HNT.

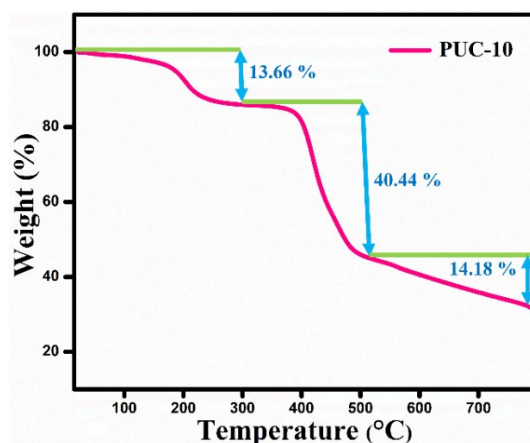

Figure S3. TGA analysis of PUC-10.

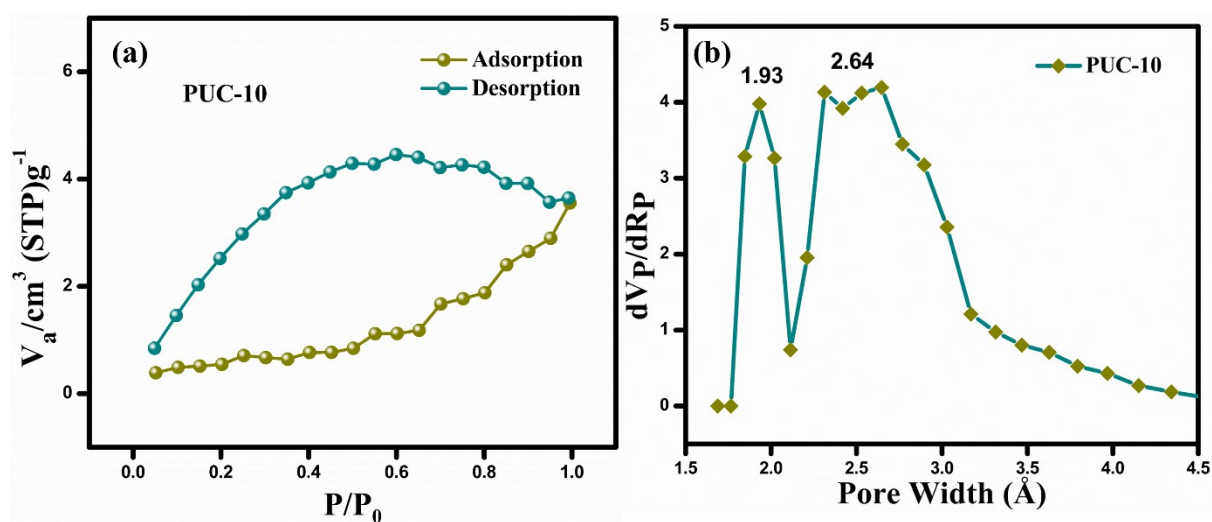

Figure S4. N<sub>2</sub> sorption isotherm for PUC-10 (a) and pore size distribution curve for PUC-10 based on adsorption isotherm (b).

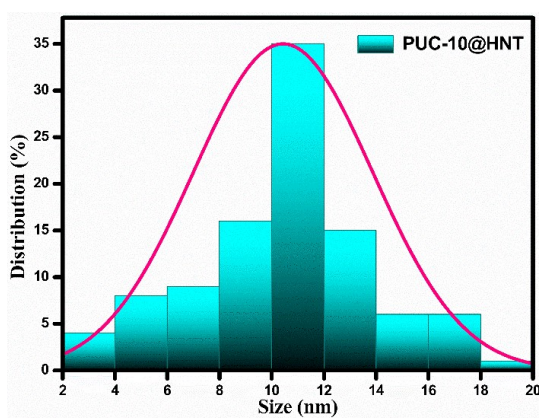

Figure S5. Size distribution histogram plot of PUC-10@HNT.

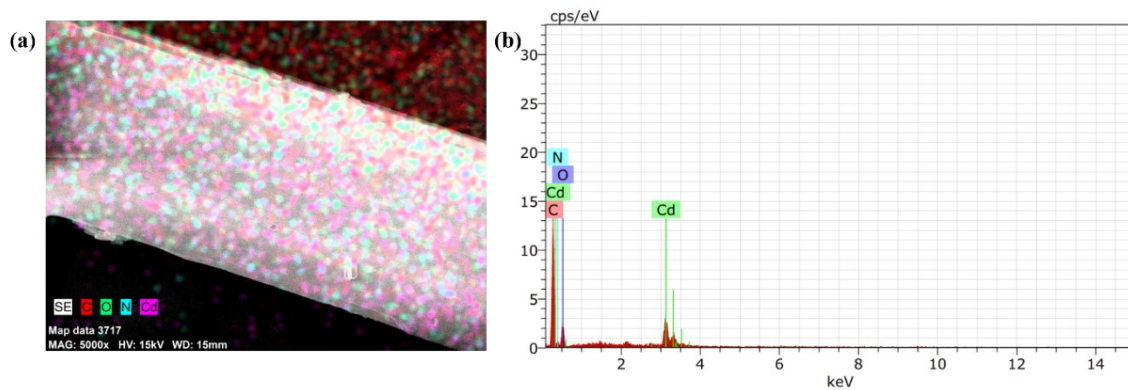

**Figure S6.** Elemental mapping (a) and EDX spectrum (b) of PUC-10.

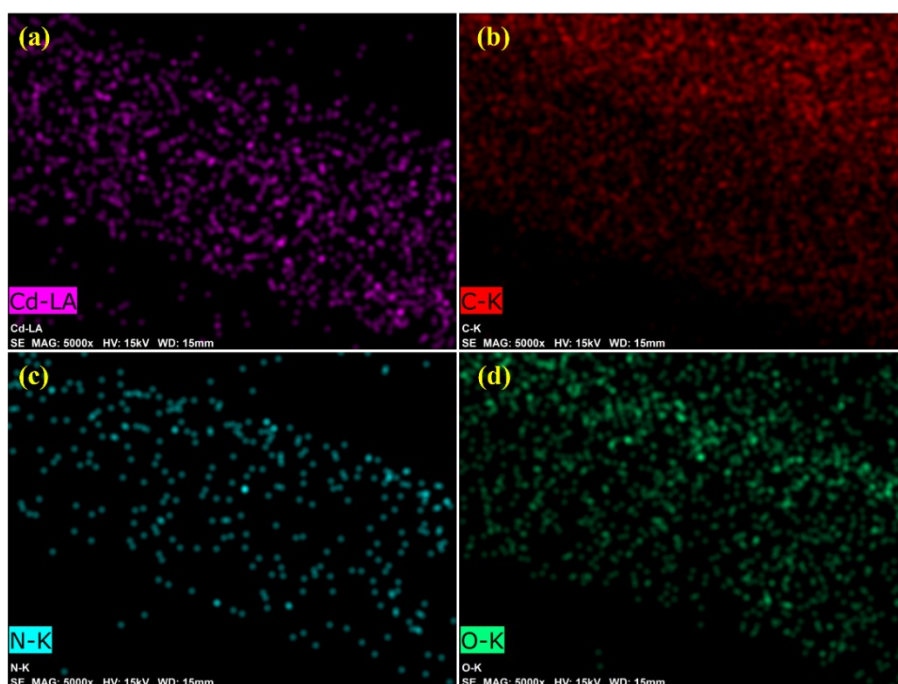

**Figure S7.** Mapping of elemental distribution of Cd (a), C (b), N (c) and O (d) of PUC-10.

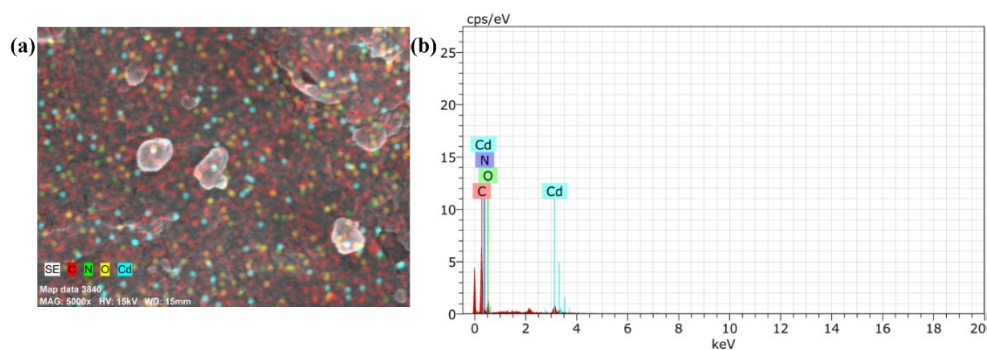

**Figure S8.** Elemental mapping (a) and EDX spectrum (b) of PUC-10 NPs.

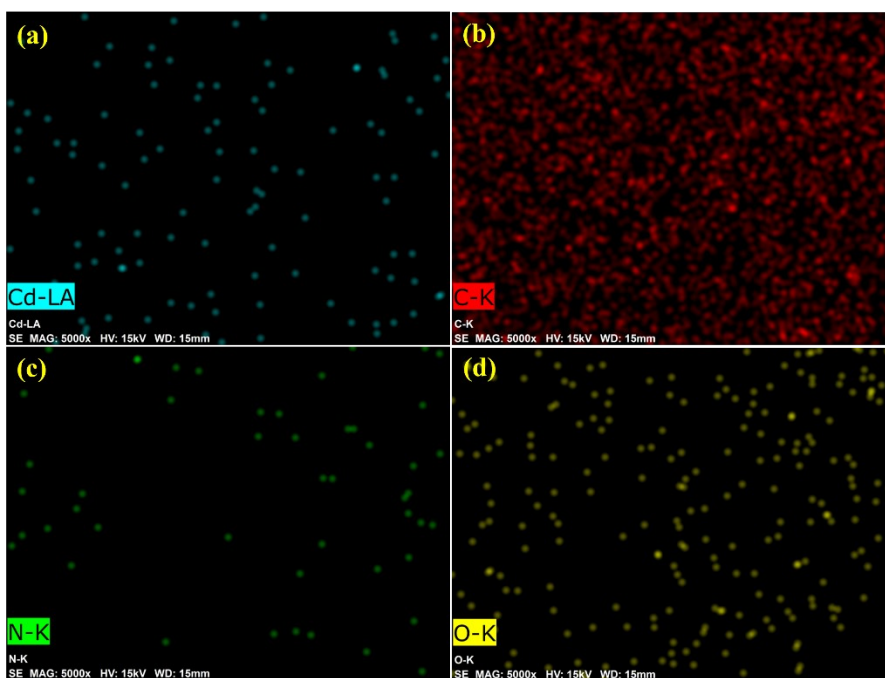

**Figure S9.** Mapping of elemental distribution of Cd (a), C (b), N (c) and O (d) of PUC-10 NPs.

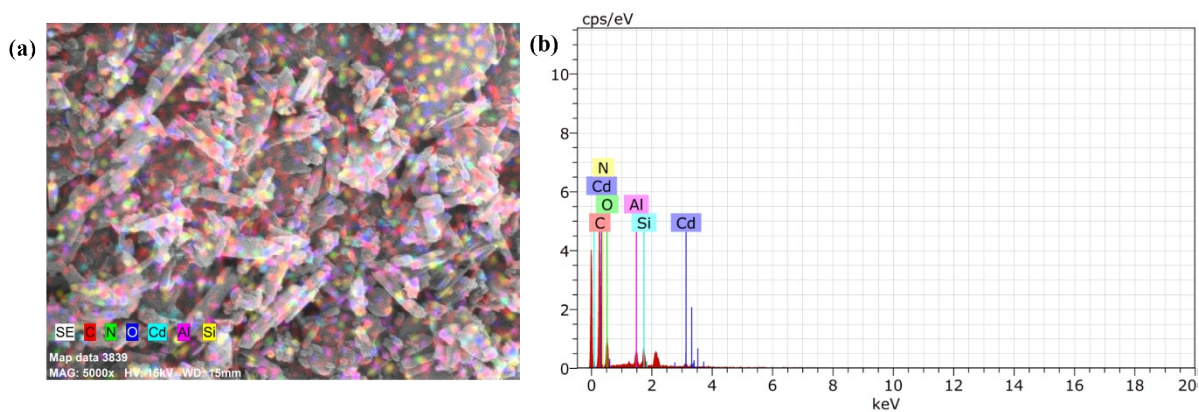

**Figure S10.** Elemental mapping (a) and EDX spectrum (b) of PUC-10@HNT.

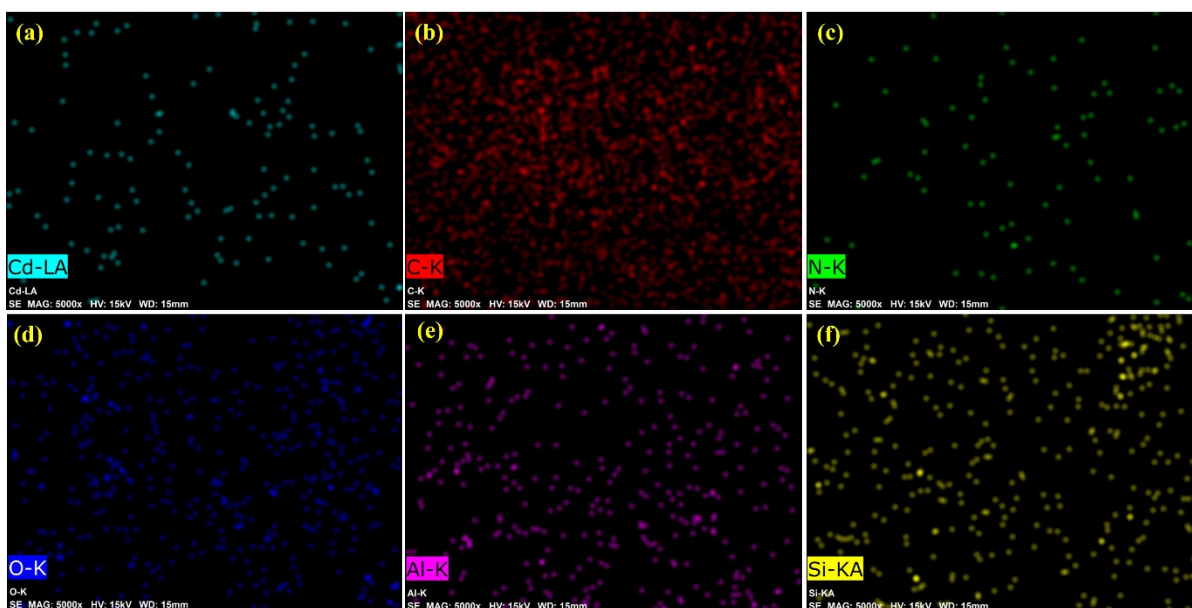

**Figure S11.** Mapping of elemental distribution of Cd (a), C (b), N (c), O (d), Al (e) and Si (f) of PUC-10@HNT.

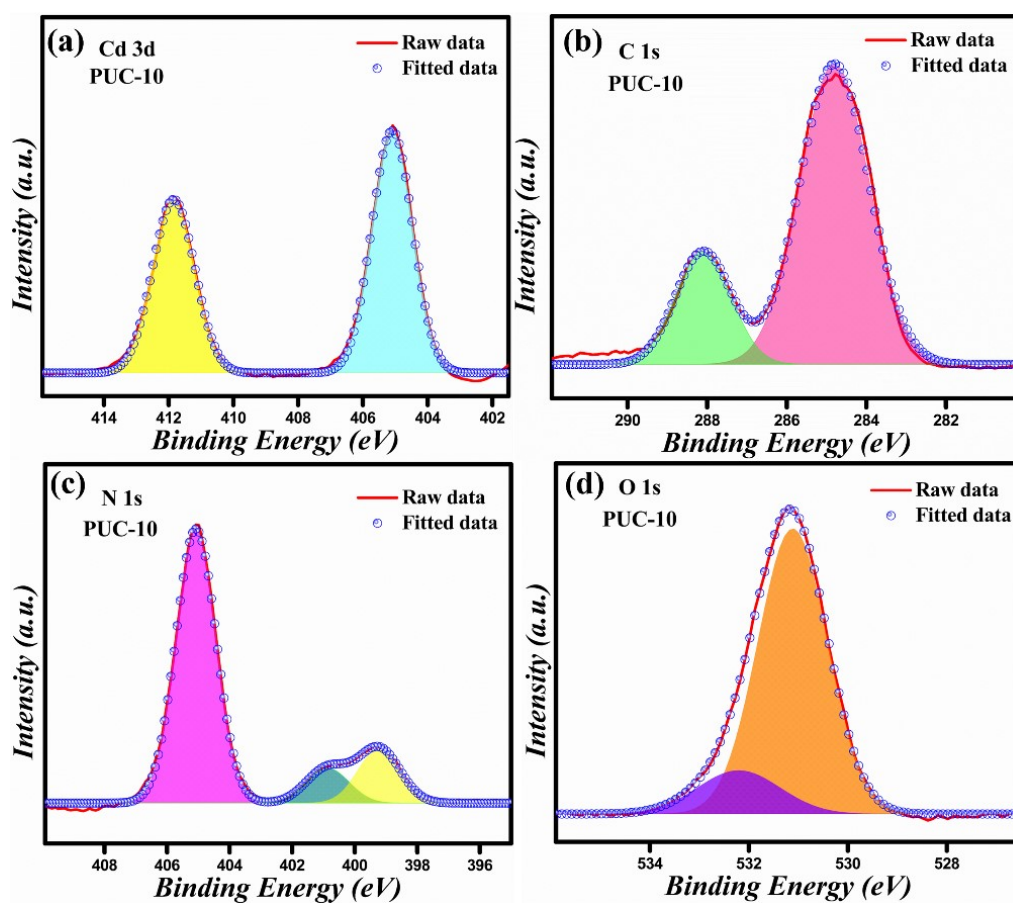

**Figure S12.** High-resolution XPS spectrum of Cd 3d (a), C 1s (b), N 1s (c) and O 1s (d) elements present in PUC-10.



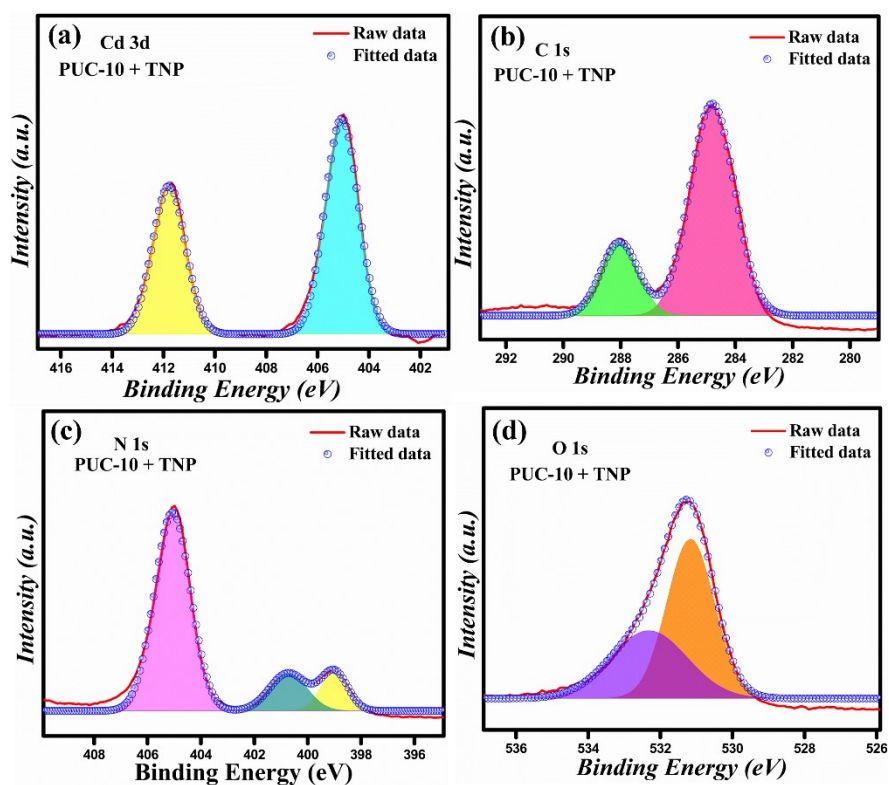

**Figure S13.** High-resolution XPS spectrum of Cd 3d (a), C 1s (b), N 1s (c) and O 1s (d) elements present in PUC-10 after treatment with TNP.

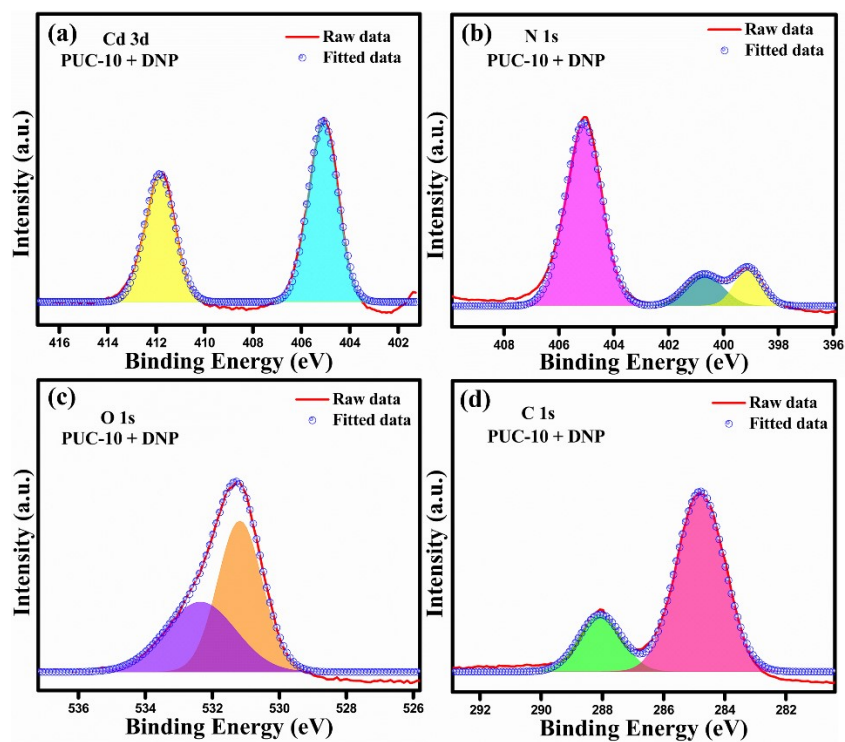

**Figure S14.** High-resolution XPS spectrum of Cd 3d (a), N 1s (b), O 1s (c) and C 1s (d) elements present in PUC-10 after treatment with DNP.

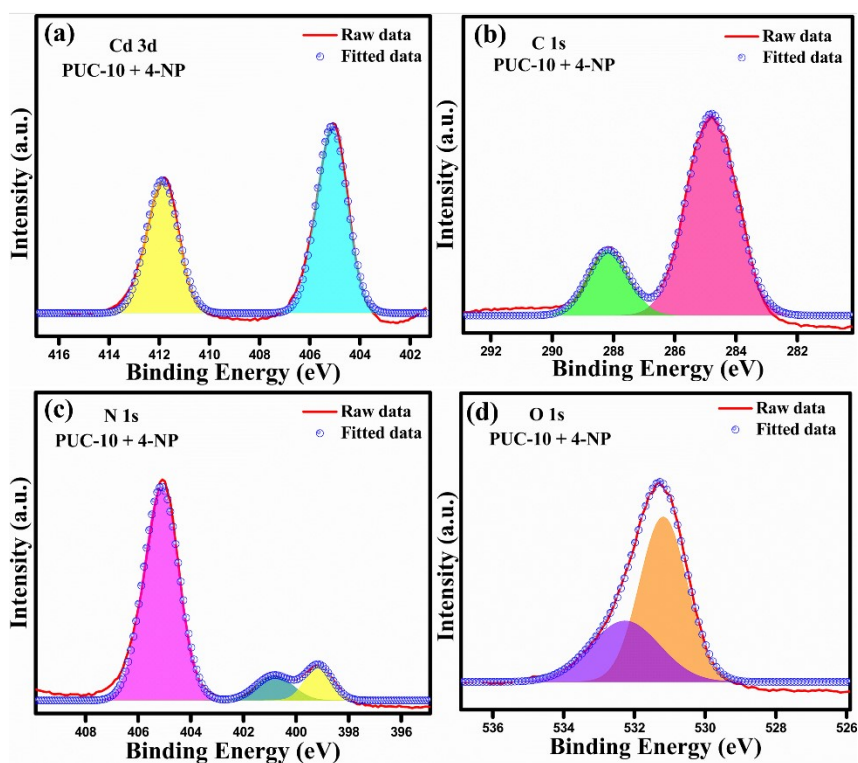

**Figure S15.** High-resolution XPS spectrum of Cd 3d (a), C 1s (b), N 1s (c) and O 1s (d) elements present in PUC-10 after treatment with 4-NP.

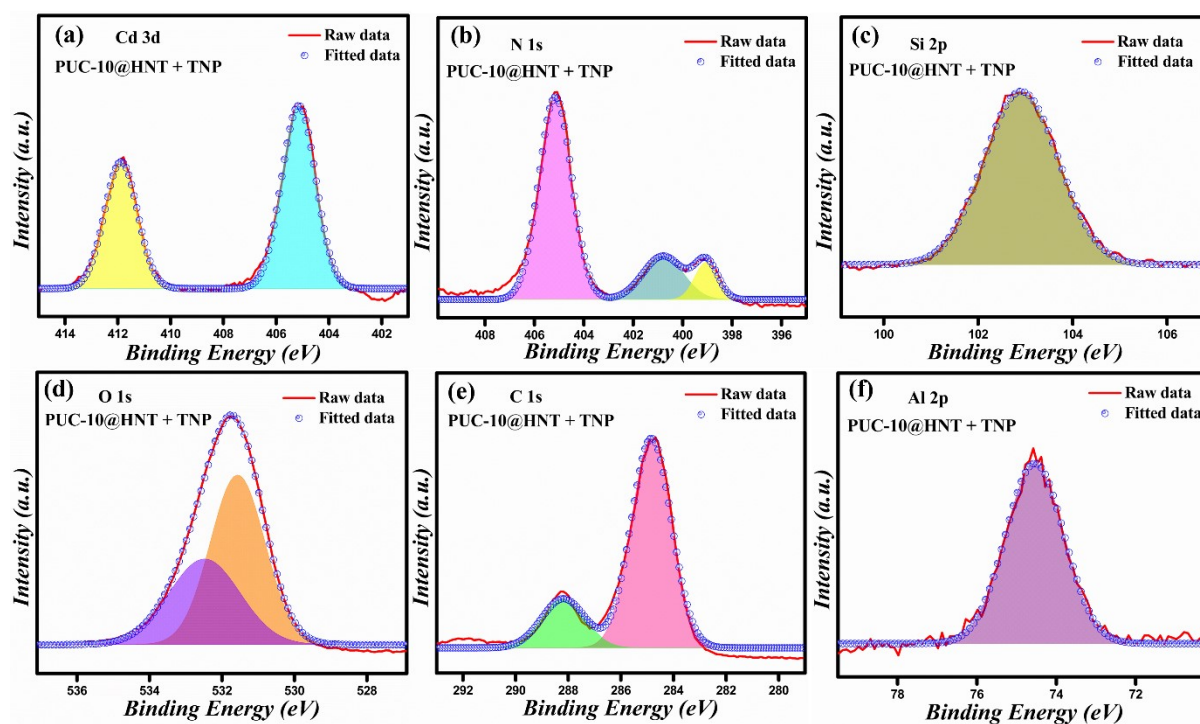

**Figure S16.** High resolution XPS spectrum of Cd 3d (a), N 1s (b), Si 2p (c), O 1s (d), C 1s (e) and Al 2p (f) elements present in PUC-10@HNT after treatment with TNP.

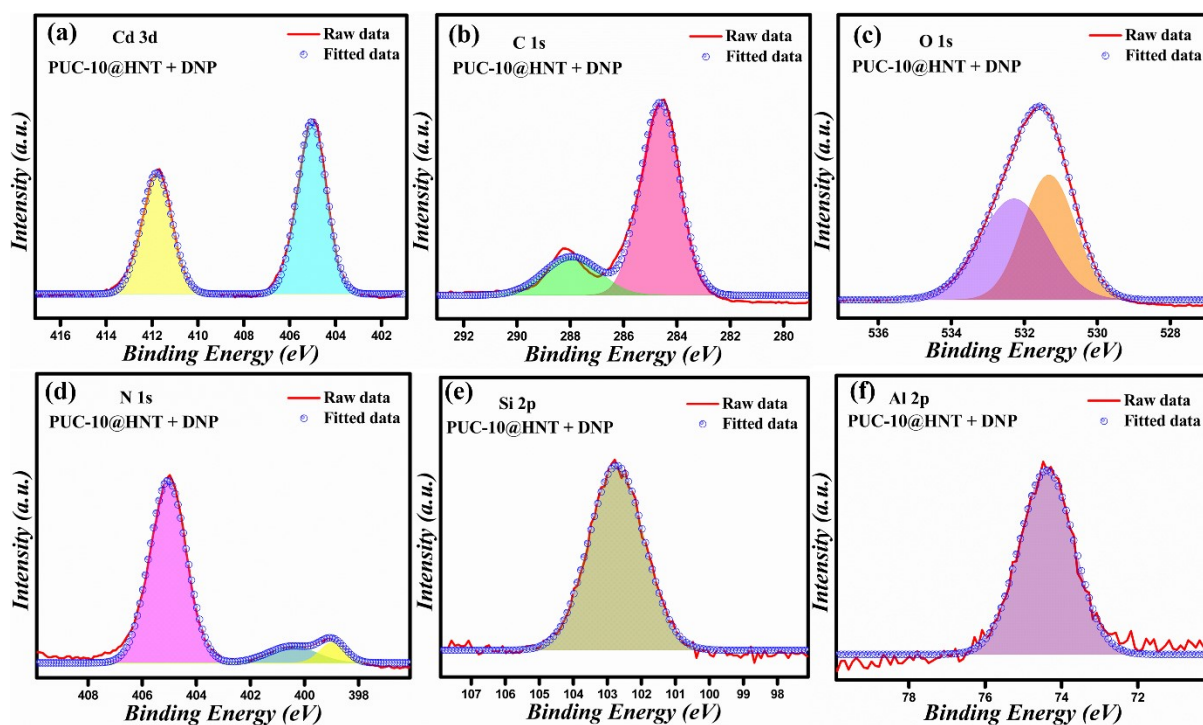

**Figure S17.** High-resolution XPS spectrum of Cd 3d (a), C 1s (b), O 1s (c), N 1s (d), Si 2p (e) and Al 2p (f) elements present in PUC-10@HNT after treatment with DNP.

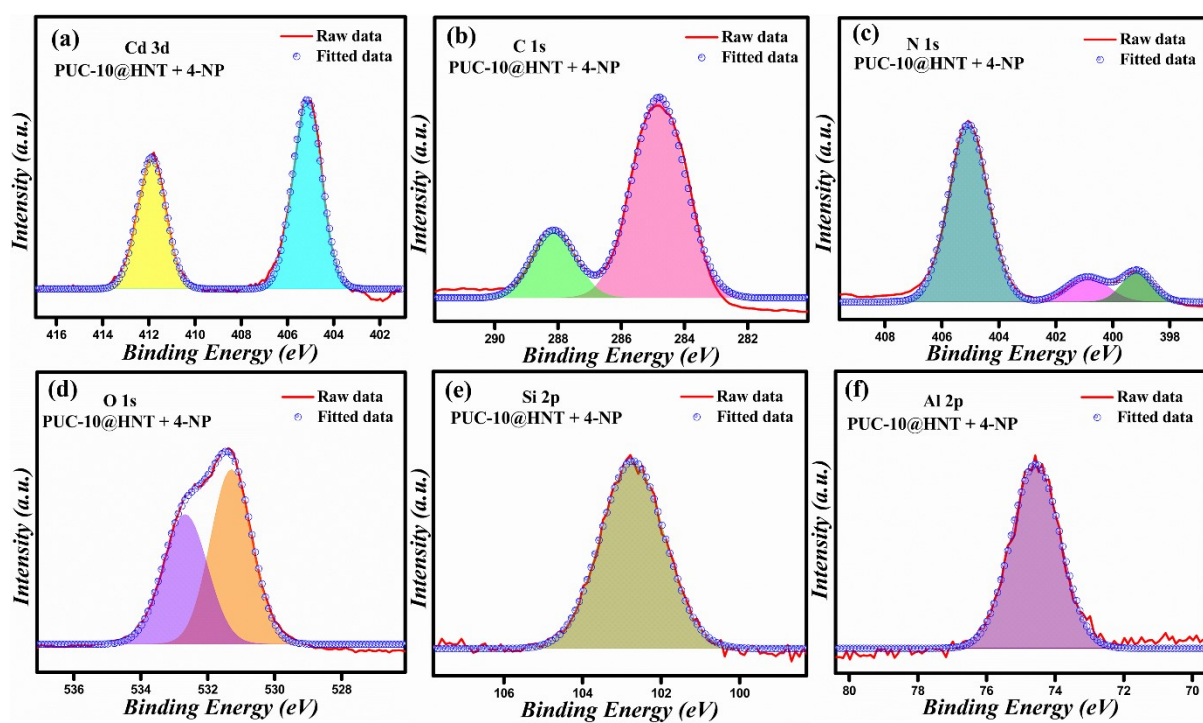

**Figure S18.** High-resolution XPS spectrum of Cd 3d (a), C 1s (b), N 1s (c), O 1s (d), Si 2p (e) and Al 2p (f) elements present in PUC-10@HNT after treatment with 4-NP.

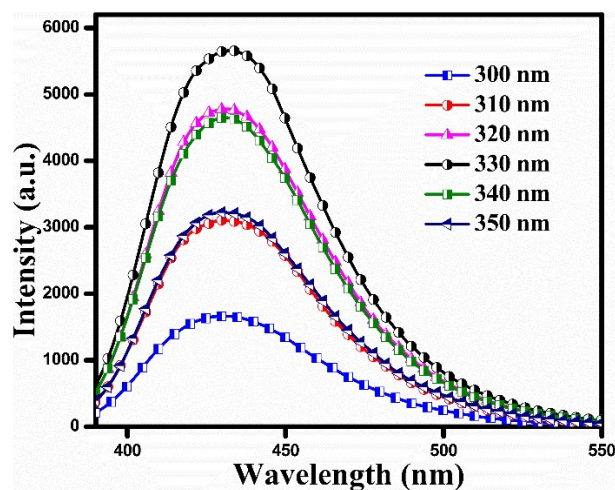

**Figure S19.** Emission spectra of PUC-10@HNT at different excitation wavelengths ranging from 300 to 350 nm.

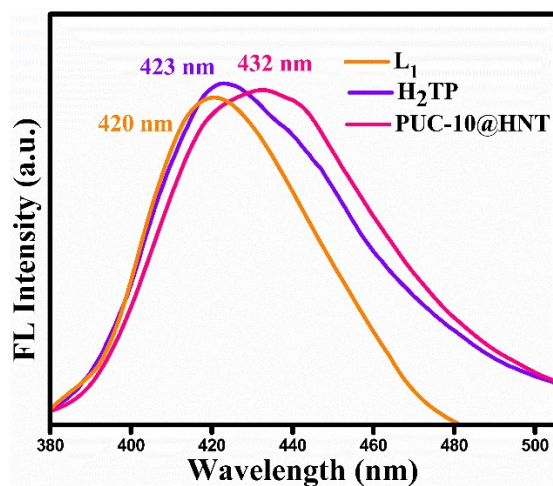

**Figure S20.** Emission spectra of PUC-10@HNT and both the ligands  $L_1$  and  $H_2TP$  used in the synthesis of PUC-10

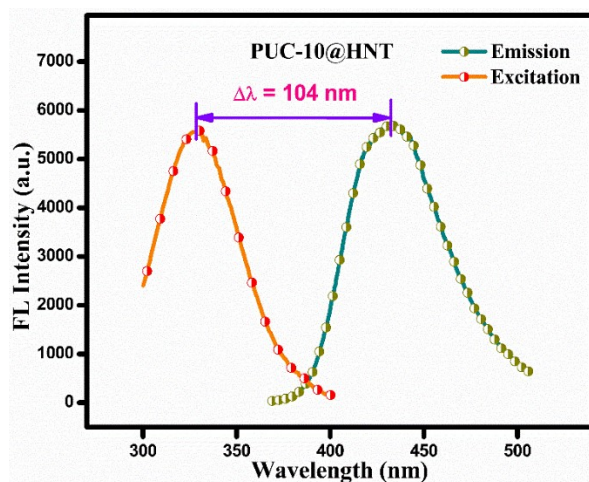

**Figure S21.** Excitation and emission spectra of PUC-10@HNT.

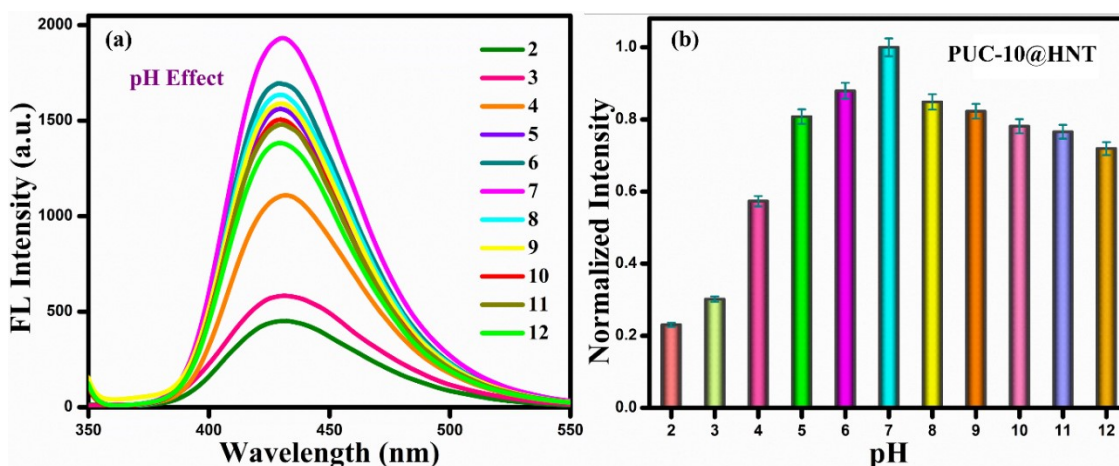

**Figure S22.** Emission spectra (a) and normalized fluorescence intensity (b) of PUC-10 at different pH values ranging from 2 to 12.

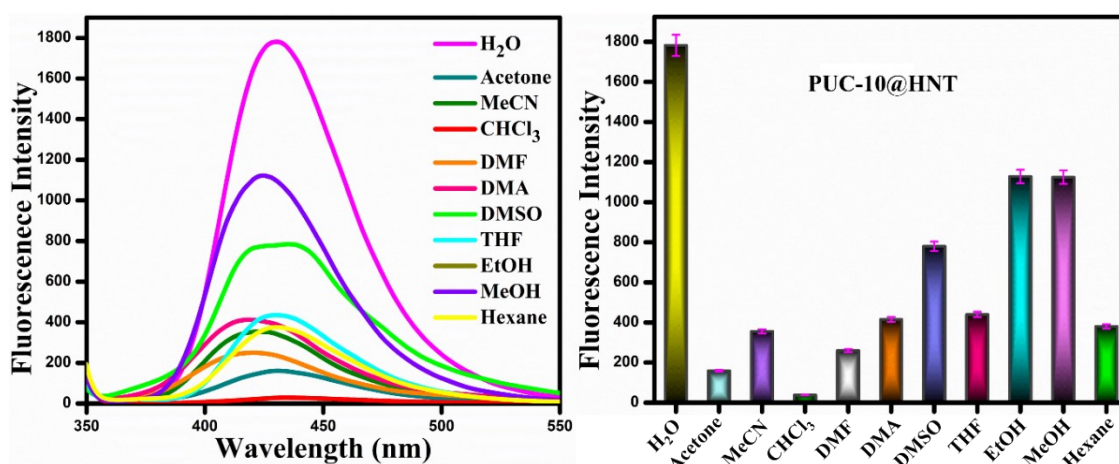

**Figure S23.** Emission spectra (a) and normalized fluorescence intensity (b) of PUC-10@HNT in different solvents.

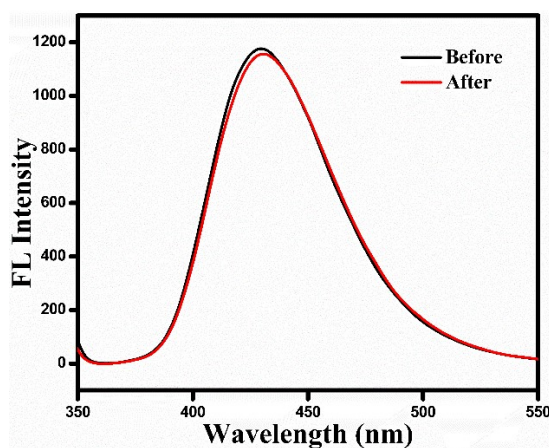

**Figure S24.** Fluorescence spectra of PUC-10@HNT before and after constant illumination of light for 3 hr to check the photostability of PUC-10

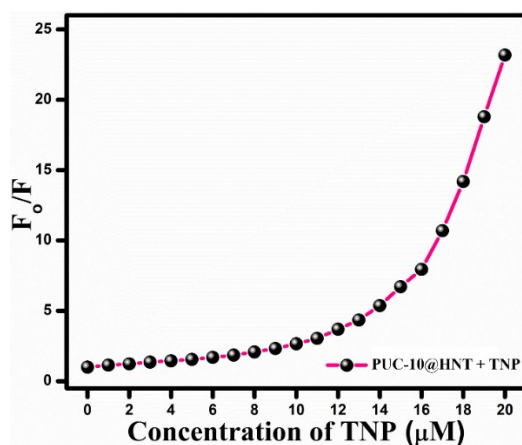

**Figure S25.** Stern-Volmer plot of PUC-10@HNT in the presence of 0-20  $\mu\text{M}$  concentration of TNP.

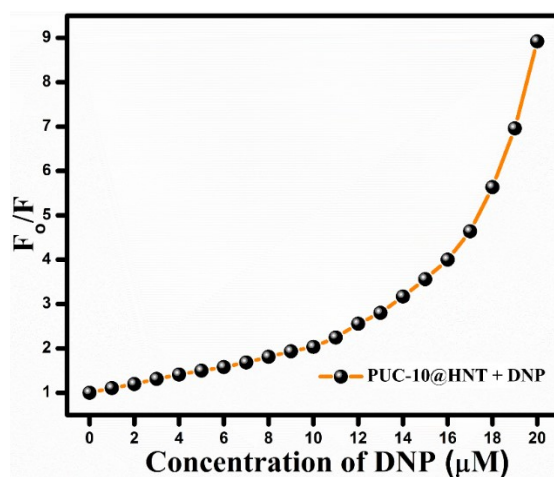

**Figure S26.** Stern-Volmer plot of PUC-10@HNT in presence of 0-20  $\mu\text{M}$  concentration of DNP.

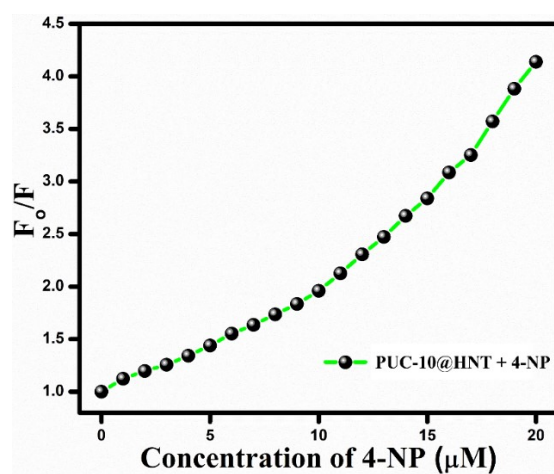

**Figure S27.** Stern-Volmer plot of PUC-10@HNT in the presence of 0-20  $\mu\text{M}$  concentration of 4-NP.

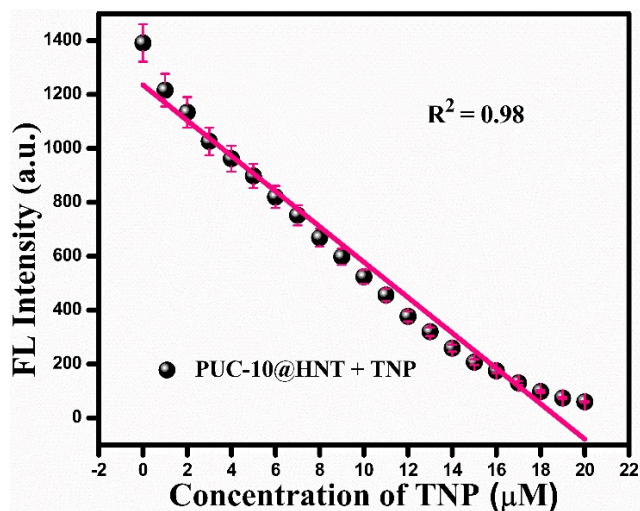

**Figure S28.** Calibration curve of PUC-10@HNT on addition of TNP (0-20  $\mu\text{M}$ ).

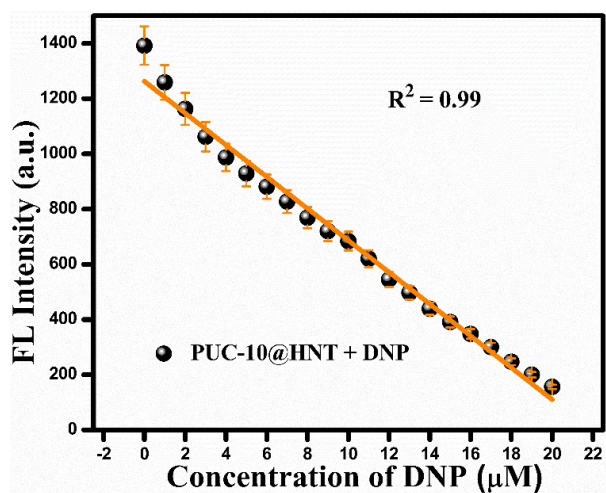

**Figure S29.** Calibration curve of PUC-10@HNT on the addition of DNP (0-20  $\mu\text{M}$ ).

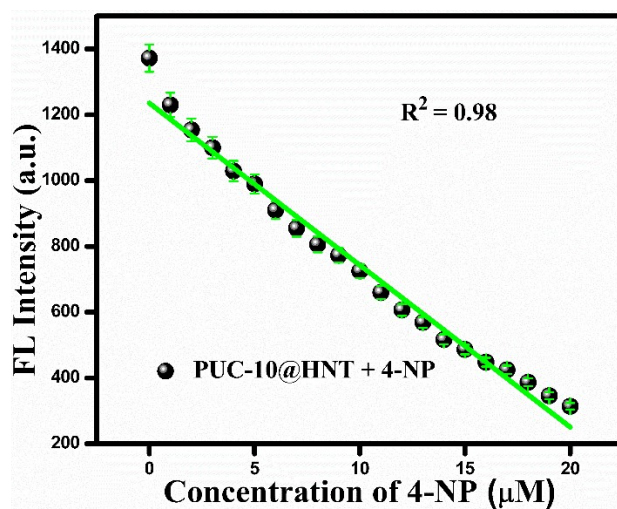

**Figure S30.** Calibration curve of PUC-10@HNT on the addition of 4-NP (0-20  $\mu\text{M}$ )

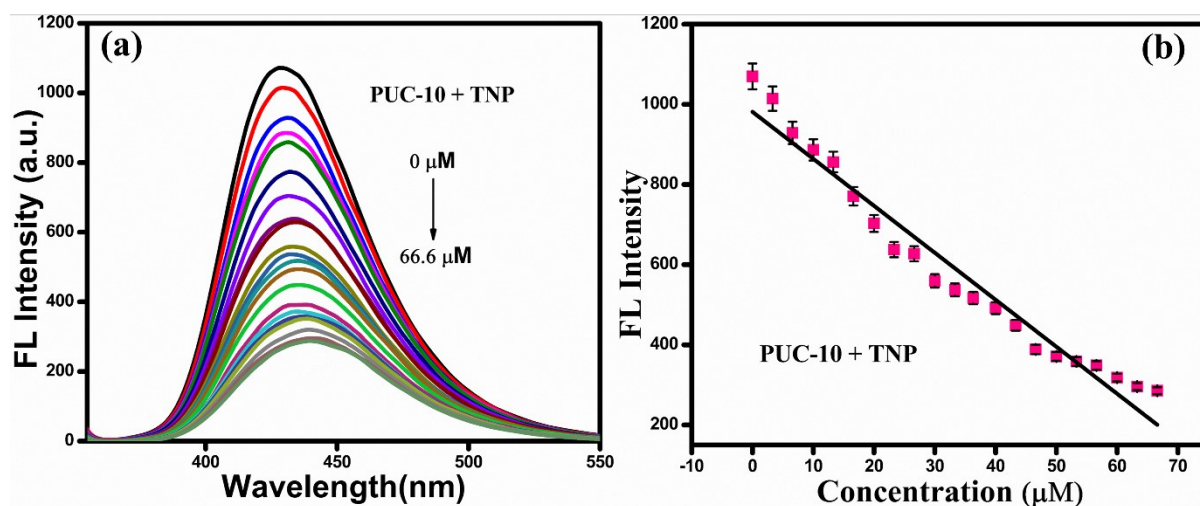

**Figure S31.** The emission spectrum of PUC-10 before and after incremental addition of TNP from 0 to 66.6  $\mu\text{M}$  concentration (a) and its Calibration curve (b).

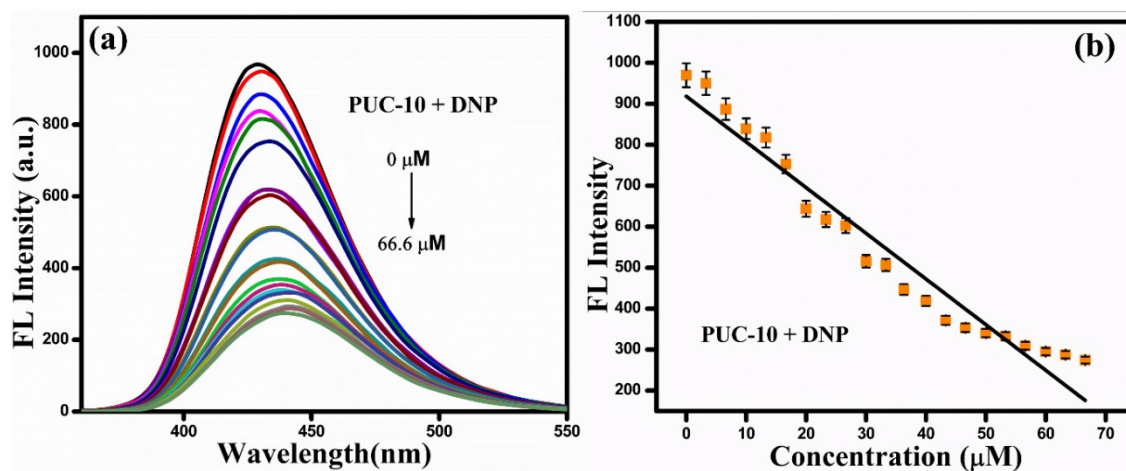

**Figure S32.** The emission spectrum of PUC-10 before and after incremental addition of DNP from 0 to 66.6  $\mu\text{M}$  concentration (a) and its Calibration curve (b).

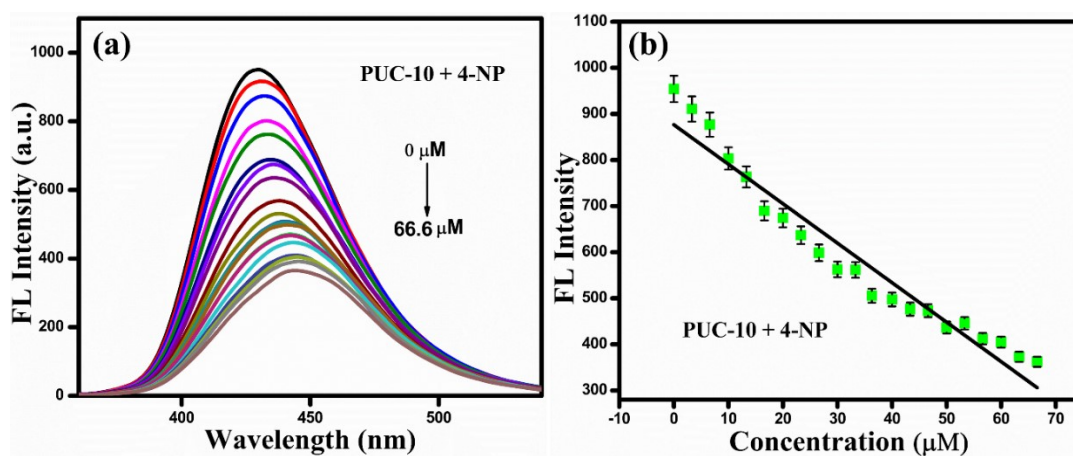



**Figure S33.** The emission spectrum of PUC-10 before and after incremental addition of 4-NP from 0 to 66.6  $\mu\text{M}$  concentration (a) and its Calibration curve (b).

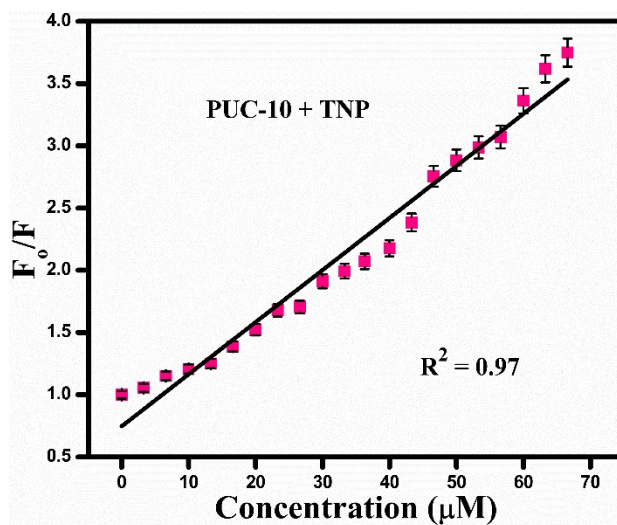

**Figure S34.** The stern-Volmer plot of PUC-10 in the presence of 0-66.6  $\mu\text{M}$  concentration of TNP.

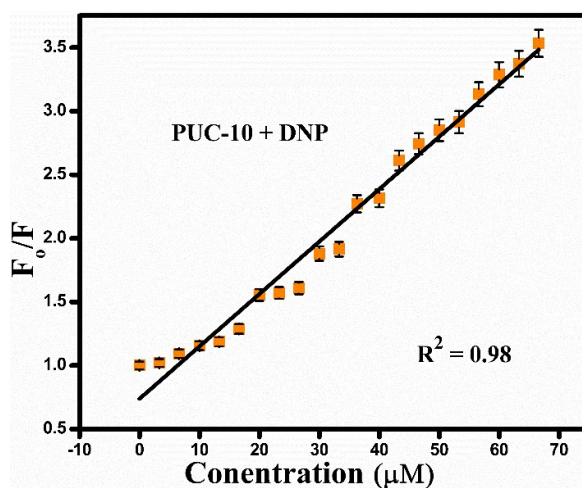

**Figure S35.** Stern-Volmer plot of PUC-10 in the presence of 0-66.6  $\mu\text{M}$  concentration of DNP.

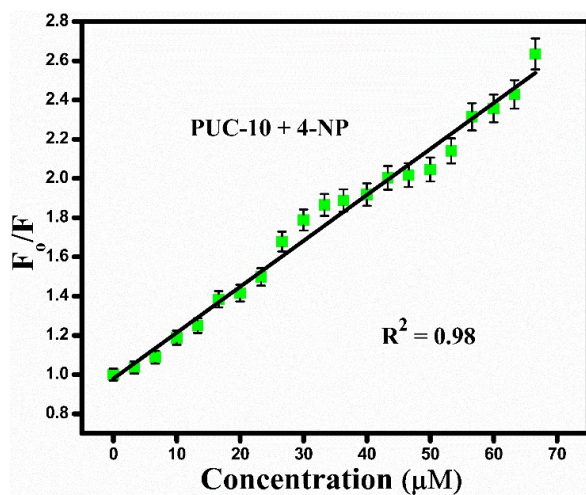

**Figure S36.** Stern-Volmer plot of PUC-10 in the presence of 0-66.6  $\mu\text{M}$  concentration of 4-NP.

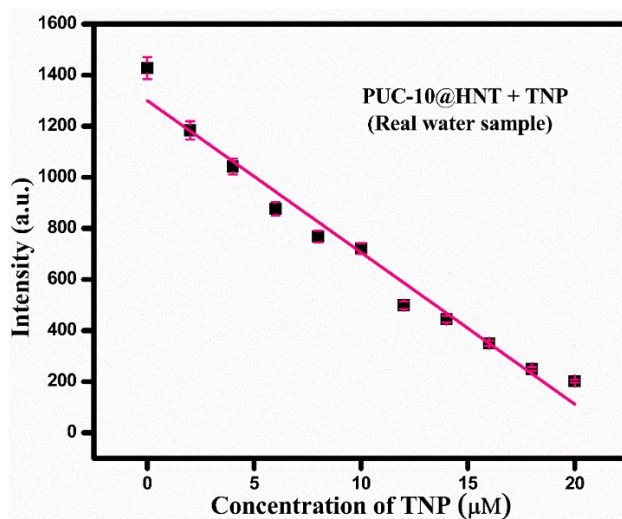

**Figure S37.** Calibration curve of PUC-10@HNT on addition of TNP (0-20  $\mu\text{M}$ ) using real water sample (tap water) as solvent.

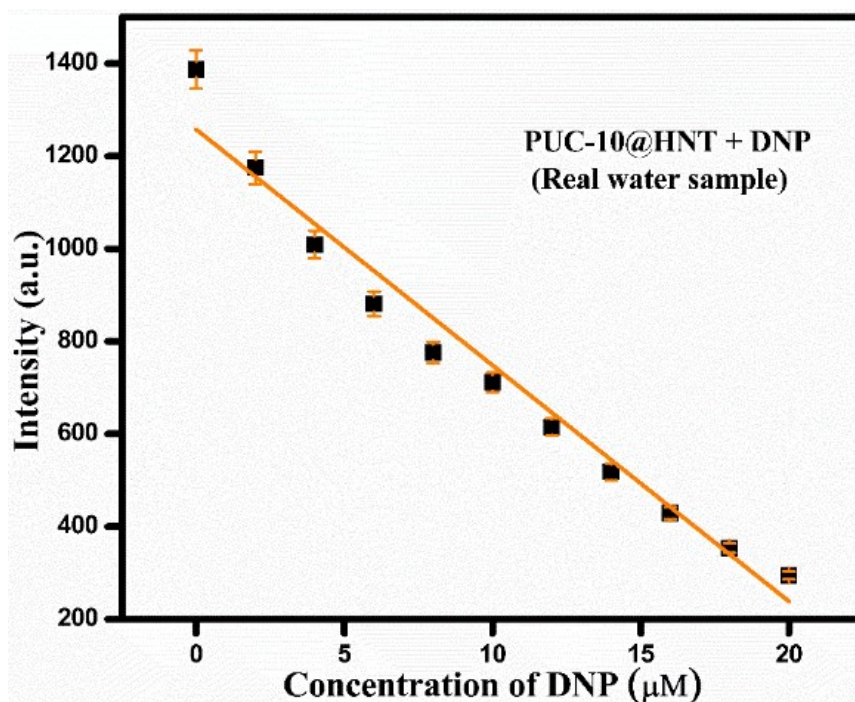

**Figure S38.** Calibration curve of PUC-10@HNT on the addition of DNP (0-20  $\mu\text{M}$ ) using real water sample (tap water) as solvent.

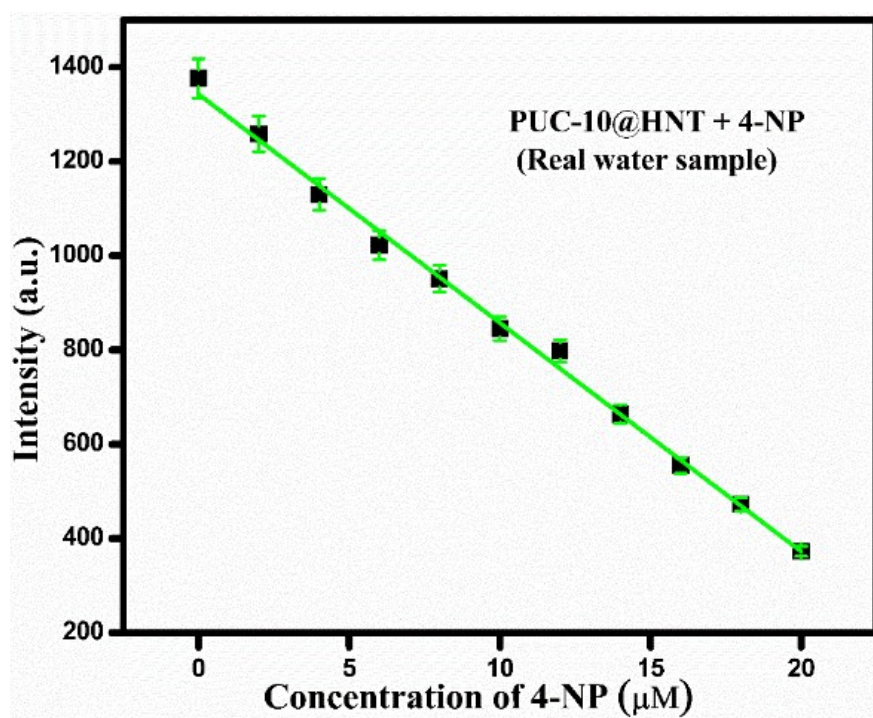

**Figure S39.** Calibration curve of PUC-10@HNT on the addition of 4-NP (0-20  $\mu\text{M}$ ) using real water sample (tap water) as solvent.

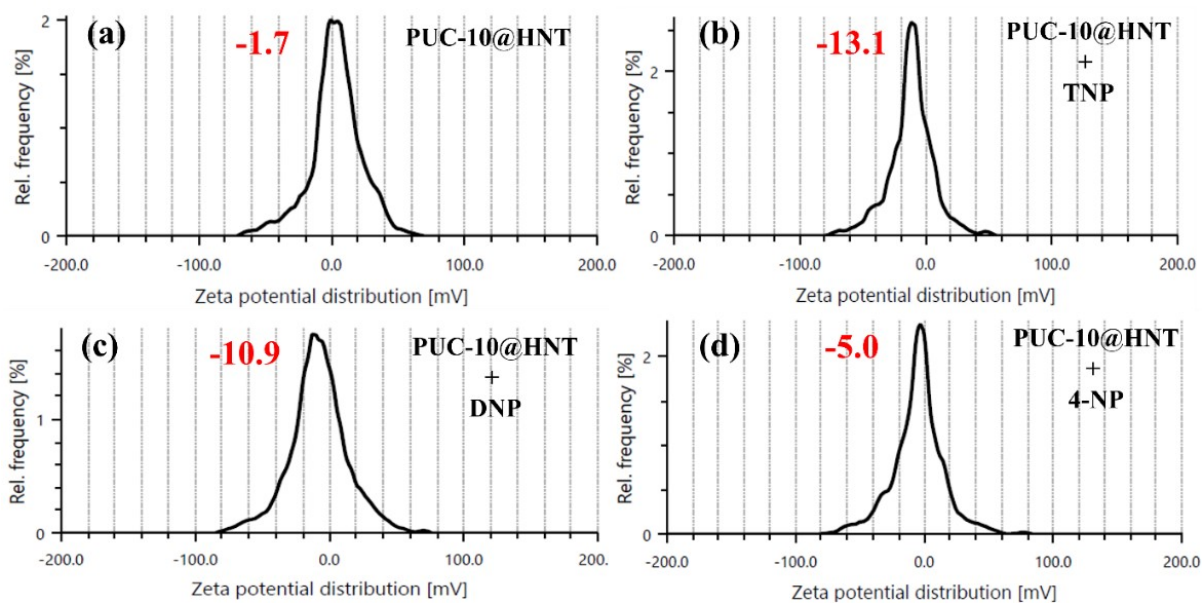

**Figure S40.** Zeta potential analysis curve of PUC-10@HNT before (a) and after the addition of TNP (b), DNP (c) and 4-NP (d).

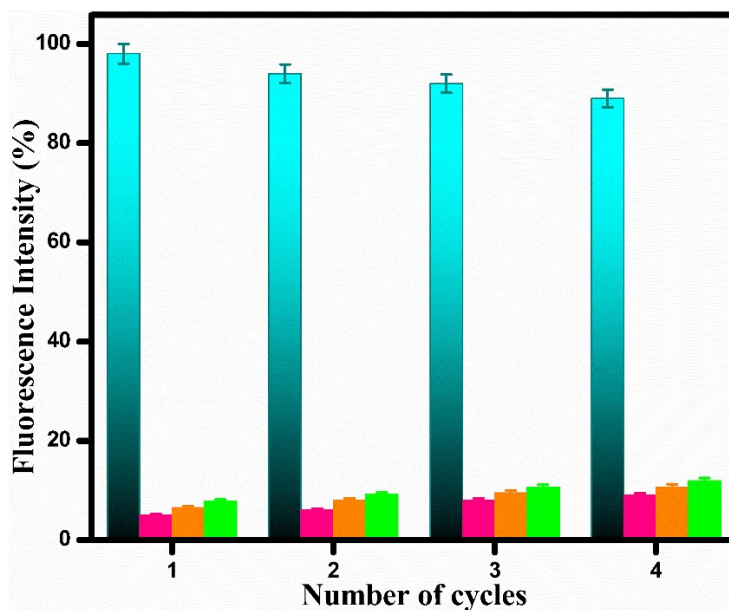

**Figure S41.** Recyclability of PUC-10@HNT with TNP (pink), DNP (orange) and 4-NP (green).

**Table S1.** Crystal data and Structure Refinement for **PUC-10**.

|                                        |                                                                 |
|----------------------------------------|-----------------------------------------------------------------|
| Identification Code                    | PUC-10                                                          |
| CCDC No.                               | 2402328                                                         |
| Empirical formula                      | C <sub>24</sub> H <sub>21</sub> CdN <sub>5</sub> O <sub>9</sub> |
| Formula weight                         | 635.86 g/mol                                                    |
| Temperature/K                          | 293(2)                                                          |
| Crystal system                         | monoclinic                                                      |
| Space group                            | <i>P2/c</i>                                                     |
| a/Å                                    | 25.1793(9)                                                      |
| b/Å                                    | 6.27470(10)                                                     |
| c/Å                                    | 20.2026(5)                                                      |
| $\alpha$ /°                            | 90                                                              |
| $\beta$ /°                             | 103.253(3)                                                      |
| $\gamma$ /°                            | 90                                                              |
| Volume (Å <sup>3</sup> )               | 3106.85(15)                                                     |
| Z                                      | 4                                                               |
| D <sub>calc</sub> (g/cm <sup>3</sup> ) | 1.359                                                           |
| $\mu$ (mm <sup>-1</sup> )              | 0.754                                                           |
| F(000)                                 | 1280.0                                                          |
| Crystal size/mm <sup>3</sup>           | 0.009×0.007×0.006                                               |
| Radiation                              | Mo K $\alpha$ ( $\lambda$ = 0.71073)                            |
| Reflections collected                  | 28608                                                           |
| Independent reflections                | 67474 [ $R_{\text{int}}$ = 0.056, $R_{\text{sigma}}$ =          |
| Data/restraints/parameters             | 0.0552]                                                         |
| Goodness-of-fit on F <sup>2</sup>      | 6474/6/355                                                      |
| Final R indexes [all data]             | 0.993                                                           |

**Table S2.** Crystallographic features for PUC-10 and PUC-10@HNT.

| Reflection number | PUC-10                    |                |                  |                       | PUC-10@HNT                 |                |                  |                       |
|-------------------|---------------------------|----------------|------------------|-----------------------|----------------------------|----------------|------------------|-----------------------|
|                   | 2 $\theta$                | Miller Indices | FWHM ( $\beta$ ) | Crystallite size (nm) | 2 $\theta$                 | Miller Indices | FWHM ( $\beta$ ) | Crystallite size (nm) |
| 1                 | 7.186                     | (200)          | 0.09722          | 81.87549              | 7.186                      | (200)          | 0.19658          | 40.49209              |
| 2                 | 10.769                    | (002)          | 0.11645          | 68.52297              | 10.769                     | (002)          | 0.20292          | 39.32338              |
| 3                 | 17.986                    | (012)          | 0.13158          | 61.12753              | 17.986                     | (012)          | 0.21325          | 37.71705              |
| 4                 | 21.621                    | (600)          | 0.13435          | 60.19966              | 21.621                     | (600)          | 0.1904           | 42.47807              |
| 5                 | 25.275                    | (700)          | 0.14954          | 54.44381              | 25.275                     | (700)          | 0.19868          | 40.97809              |
|                   | Average size = 65.2290 nm |                |                  |                       | Average size = 40.19773 nm |                |                  |                       |

**Table S3.** Compositional ratios of all the elements present in PUC-10 and PUC-10@HNT

| Sample     | Cd (at%) | O (at%) | N (at%) | C (at%) | Si (at%) | Al (at%) |
|------------|----------|---------|---------|---------|----------|----------|
| PUC-10     | 2.11     | 17.21   | 25.59   | 55.09   | -        | -        |
| PUC-10@HNT | 2.01     | 18.81   | 20.72   | 56.12   | 2.47     | 0.5      |
